# Supplementary material
Source: bioRxiv or medRxiv preprint supplement (https://www.biorxiv.org/highwire/filestream/24438/field_highwire_adjunct_files/2/087247-2.pdf)

A

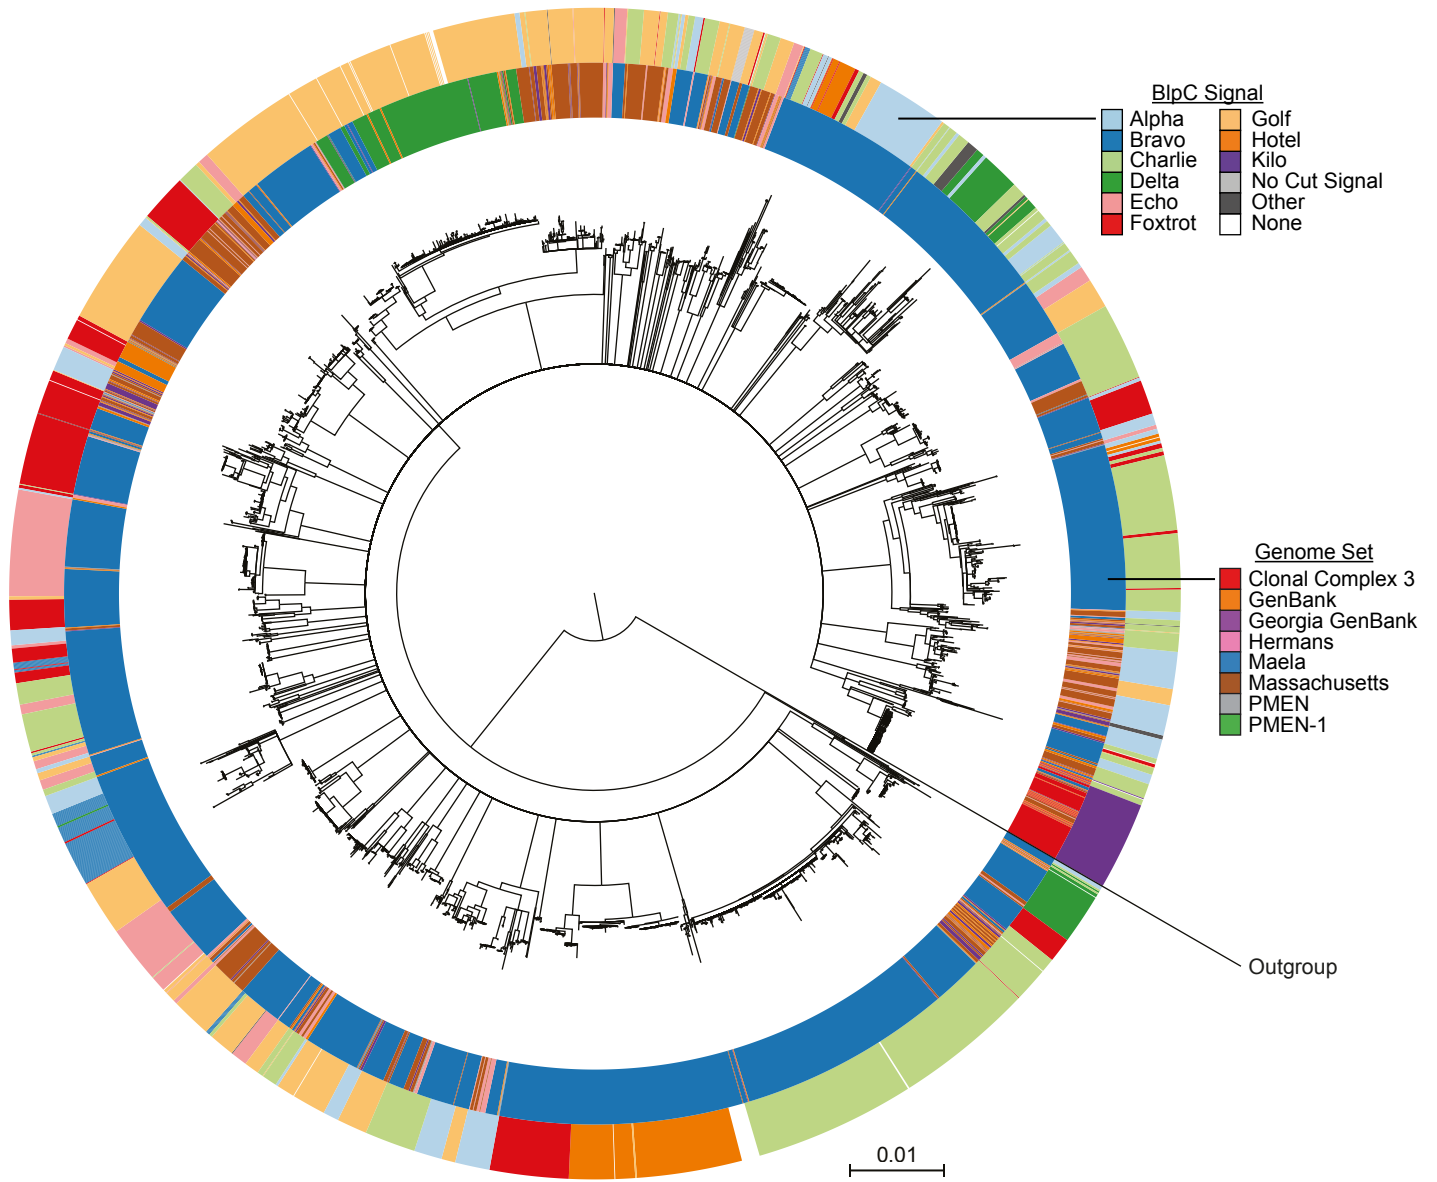

B

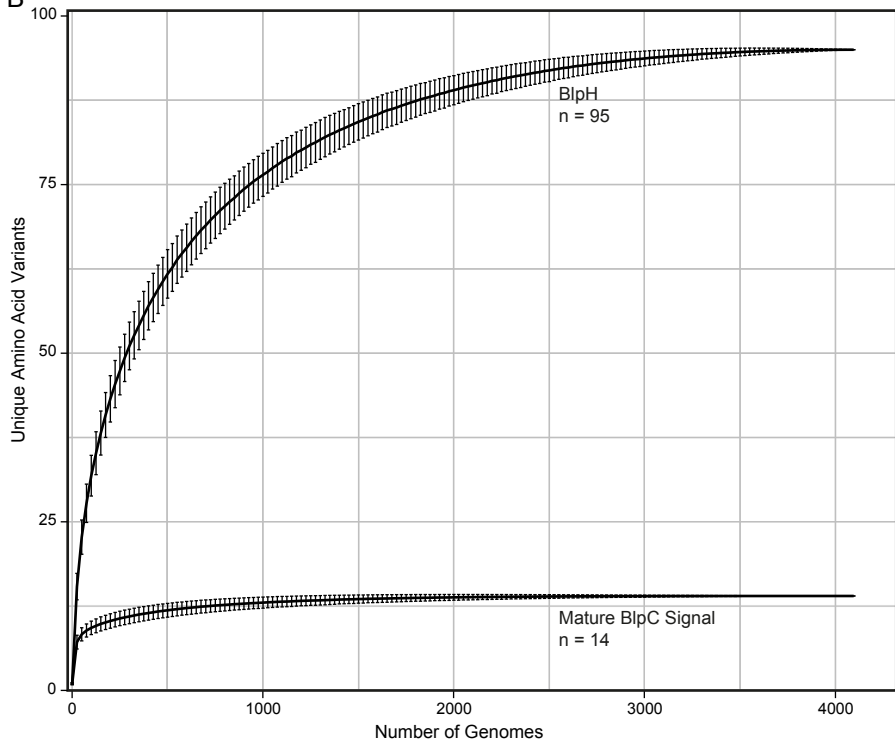

Supplement: Supplementary file [file 087247-2.pdf]
